# Supplementary material for: The Transcription Factor Elf3 Is Essential for a Successful Mesenchymal to Epithelial Transition
Source: MDPI journal article supplement (doi:10.3390/cells8080858), 2019-08-09
Supplement: s1 [file s1]

Table S1. NCBI GEO accession numbers and phenotypes of samples used in correlation studies

| Study GEO Accession | Phenotype   | Sample         |
|---------------------|-------------|----------------|
| <b>GSE130548</b>    | Epithelial  | GSM3742048.CEL |
| <b>GSE130548</b>    | Epithelial  | GSM3742049.CEL |
| <b>GSE130548</b>    | Epithelial  | GSM3742050.CEL |
| <b>GSE130548</b>    | Mesenchymal | GSM3742051.CEL |
| <b>GSE130548</b>    | Mesenchymal | GSM3742052.CEL |
| <b>GSE130548</b>    | Mesenchymal | GSM3742053.CEL |
| <b>GSE55072</b>     | Epithelial  | GSM1329077.CEL |
| <b>GSE55072</b>     | Epithelial  | GSM1329078.CEL |
| <b>GSE55072</b>     | Mesenchymal | GSM1329081.CEL |
| <b>GSE55072</b>     | Mesenchymal | GSM1329082.CEL |
| <b>GSE55711</b>     | Epithelial  | GSM1342162.CEL |
| <b>GSE55711</b>     | Epithelial  | GSM1342163.CEL |
| <b>GSE55711</b>     | Mesenchymal | GSM1342164.CEL |
| <b>GSE55711</b>     | Mesenchymal | GSM1342165.CEL |
| <b>GSE77551</b>     | Epithelial  | GSM2054383.CEL |
| <b>GSE77551</b>     | Epithelial  | GSM2054384.CEL |
| <b>GSE77551</b>     | Epithelial  | GSM2054385.CEL |
| <b>GSE77551</b>     | Mesenchymal | GSM2054377.CEL |
| <b>GSE77551</b>     | Mesenchymal | GSM2054378.CEL |
| <b>GSE77551</b>     | Mesenchymal | GSM2054379.CEL |

Table S2. Sequence information of siRNAs used.

| siRNA     | Sequences                              | Vendor    |
|-----------|----------------------------------------|-----------|
| siElf3_2  | TTGAACCAACTTGTTGATAA                   | Qiagen    |
| siElf3_10 | GGUAAUACUACAAACGGGA                    | Dharmacon |
| siElf3_12 | GGUUGGAGAGAGAGUCGGAU                   | Dharmacon |
| siCntrl   | Silencer™ Negative Control No. 1 siRNA | Dharmacon |
| siEhf_1   | AACAATTTATGTTTAATGAAA                  | Qiagen    |
| siEhf_2   | ACCCTTGATCTATTTAATCAA                  | Qiagen    |
| siEhf_3   | AAGGAACACTACAGTTGATAA                  | Qiagen    |
| siEhf_4   | CAGCAAATGGATTCTGATCAA                  | Qiagen    |

Table S3. Primers and corresponding UPL probes used in qPCR experiments.

| Primers        | Forward                 | Reverse                  | Probe |
|----------------|-------------------------|--------------------------|-------|
| <b>Ahr</b>     | TGCACAAGGAGTGGACGA      | AGGAAGCTGGTCTGGGGTAT     | 27    |
| <b>Cdh1</b>    | ATCCTCGCCCTGCTGATT      | ACCACCGTTCTCCTCCGTA      | 18    |
| <b>Cdh2</b>    | TCCCTGAGATACAGCGTCACT   | ATAATGAAGATGCCCCGTTGG    | 17    |
| <b>Cebpa</b>   | AAACAACGCAACGTGGAGA     | GCGGTCATTGTCACTGGTC      | 67    |
| <b>Ehf</b>     | TCATTGTCAAGACTGAACAAACC | GTCCAACAGATCTACTGTGCTACC | 33    |
| <b>Elf3</b>    | ACCGAACCCTGACACACCT     | AGCTGTACATGGCGTTGAAGT    | 46    |
| <b>Exosc9</b>  | CAAGGTGCCCCCTATAGTGCT   | GGTCTGAGCTCTTATTTTCTTTGG | 106   |
| <b>Fn1</b>     | AGGTGGACCCCGCTAAAC      | TGCCGCAACTACTGTGATTC     | 31    |
| <b>Gapdh</b>   | AGCTTGTCAATCAACGGGAAG   | TTTGATGTTAGTGGGGTCTCG    | 9     |
| <b>Grhl3</b>   | AAGGAAGATGTGAATGAACCTG  | TCGTCCTCATTACTGTAGGGAAA  | 100   |
| <b>Ovol2</b>   | GTGAGGATTGCGGCTACAC     | TGGTCACTGTTACATGCAG      | 79    |
| <b>Snai1</b>   | CTTGCTCCACAAGCACCA      | GAGGATGGGGAGGTAGCAG      | 71    |
| <b>Snai2</b>   | ATCCTTGGGGCGTGTAAGT     | TGAACCACTGTGATCCTTGG     | 6     |
| <b>Zeb1</b>    | TGGAGTTCAAAGGTTGTCGTT   | TTGCCACATCAACACTGGTC     | 109   |
| <b>Zeb2</b>    | TTGCTCCAGGATGTGTGG      | CACACACTTGTTTGTGTGCATATC | 64    |
| <b>Cas21</b>   | CCACCTTTGACCCAGGAA      | AGGCTCCTGCTTCACCTG       | 66    |
| <b>Sox9</b>    | GTACCCGCATCTGCACAAC     | CTCCTCCACGAAGGGTCTCT     | 75    |
| <b>Sp6</b>     | TTCGGCCTAGGTCTCTTTCA    | CCCACACACACACCTCATCT     | 32    |
| <b>Tfcp2l1</b> | GGGGACTACTCGGAGCATCT    | TTCCGATCAGCTCCCTTG       | 53    |
| <b>Zfp750</b>  | GAGCCAGCGTGAGAACAGA     | CAGGAGAGTTCCTTCCGTCA     | 68    |
| <b>Irf6</b>    | GCTTGCTGCTCCTAACCTGA    | CTTTCTGGTGGGCAATGAG      | 34    |
| <b>Vdr</b>     | CACCTGGCTGATCTTGTCAGT   | CTGGTCATCAGAGGTGAGGTC    | 89    |
| <b>Elf1</b>    | CCAGAGGAAGCAACCATAGC    | AACCTGGGTTGAAGCCTGTA     | 38    |

Table S4. Sequences of oligonucleotides used for the cloning of the Grhl3 promoter.

|                    | Forward                           | Reverse                          |
|--------------------|-----------------------------------|----------------------------------|
| Grhl3 1kb Promoter | GCTAGCCTCGAGTGCCTAGCACAGAGCACTTAC | GGATCCAAGCTTGGTGCCGACTGCAGCTAGAC |

Table S5. qPCR primers and UPL probes used in ChIP experiments

| Primers               | Forward               | Reverse              | Probe |
|-----------------------|-----------------------|----------------------|-------|
| <b>Grhl3_Prom_52</b>  | TCTAGTTCTCCCGTTCCTTCC | TTCTTAGCTGAGGGGGTGAG | 52    |
| <b>Grhl3_Prom_108</b> | GGAGAAAAGAGAGGGGACTCA | TCACCTTCTCTACCCGGAAA | 108   |

Table S6. Primers used in RT-PCR experiments

| Primers          | Forward               | Reverse              |
|------------------|-----------------------|----------------------|
| <b>Casz1_RT</b>  | TCTACTACCACGGCTGCCAC  | TCGTTGCTGGATTCCTCGTG |
| <b>Zfp750_RT</b> | CGACTCCAGCAAGCTGAGCA  | GGCGTTGCTTGCATACATGG |
| <b>Elf3_RT</b>   | GTCTGGAGGGCAAGAAGAGC  | CCAACCTCTTCTTCCTTCCA |
| <b>Tbp_RT</b>    | AGCCTCAGTACAGCAATCAAC | GAACTTCACATCACAGCTCC |
